# Supplementary material for: Phylogenetic, Molecular, and Functional Characterization of PpyCBF Proteins in Asian Pears (Pyrus pyrifolia)
Source: Int J Mol Sci. 2019 Apr 26;20(9):2074. doi: 10.3390/ijms20092074 (PMC6539064; doi:10.3390/ijms20092074)
Supplement: Supplementary file 1 [file ijms-20-02074-s001.pdf]

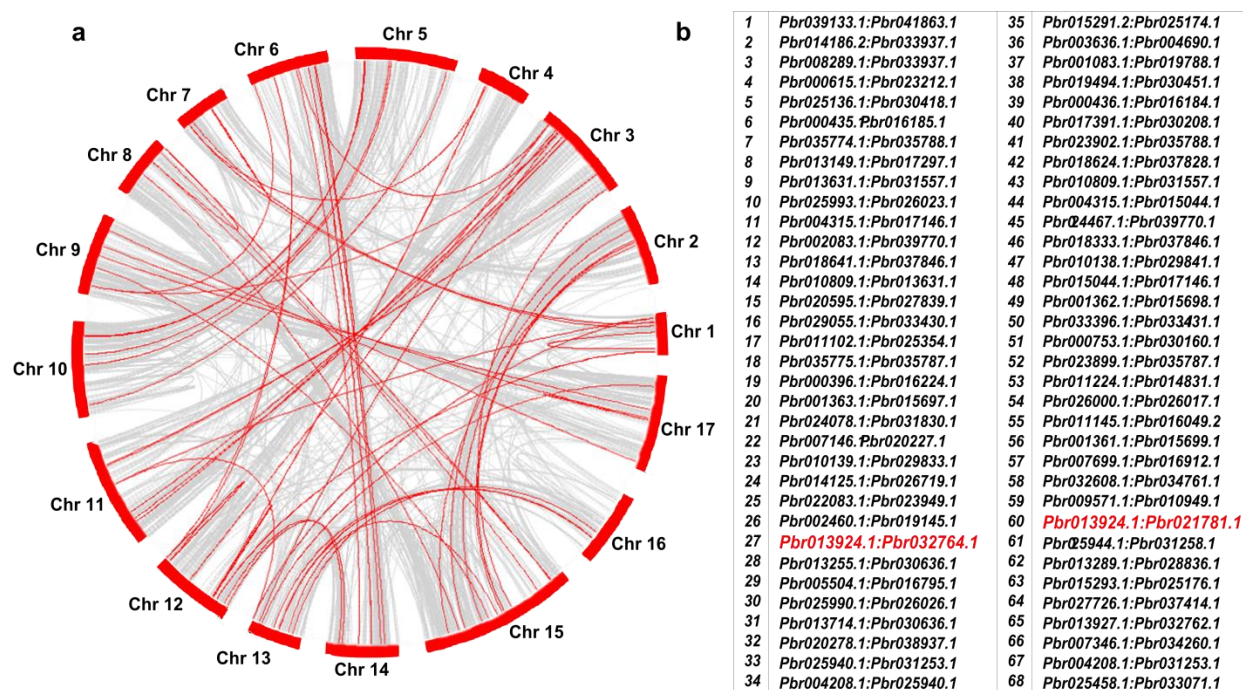

**Figure S1. Collinearity analysis of *PpyAP2/ERF* TFs. **a** Red lines indicate the *PpyERFS* duplicated genes while the gray lines show the whole genome duplication events. Red bars indicate each chromosome number. **b** Duplicated gene pairs of *PpERFs* TFs while the red highlighted duplicated gene pairs belong to *PpyCBFs* subfamily.**



**Table S2. Total number of stress related *cis*-elements in promoters of *PpyCBF* TFs:**

| TFs            | Cold | Salt | Drought | Oxidative | Light | Iron toxicity | Pathogen | Heat | ABA | GA | Auxin |
|----------------|------|------|---------|-----------|-------|---------------|----------|------|-----|----|-------|
| <i>PpyCBF3</i> | 9    | 11   | 8       | 3         | 15    | 1             | 5        | 0    | 1   | 6  | 3     |
| <i>PpyCBF1</i> | 8    | 11   | 8       | 1         | 16    | 4             | 3        | 1    | 5   | 3  | 2     |
| <i>PpyCBF2</i> | 8    | 13   | 6       | 3         | 18    | 1             | 7        | 2    | 7   | 6  | 2     |
| <i>PpyCBF4</i> | 6    | 11   | 8       | 1         | 12    | 4             | 3        | 2    | 7   | 4  | 2     |
| <i>PpyCBF5</i> | 13   | 15   | 11      | 1         | 12    | 1             | 8        | 0    | 1   | 2  | 2     |
| <i>PpyCBF6</i> | 7    | 13   | 9       | 2         | 15    | 1             | 5        | 3    | 7   | 3  | 1     |

**Table S3. Promoter analysis of *PpyCORs*:**

| TFs family       | Functions            | <i>cis</i> -element | Sequences | <i>PpyCOR47</i> | <i>PpyCOR15A</i> | <i>PpyRD29A</i> | <i>PpyKIN</i> |
|------------------|----------------------|---------------------|-----------|-----------------|------------------|-----------------|---------------|
| <b>ABF/AREB</b>  | ABA responsive       | ABRE                | CATGC     | 5               | 5                | 3               | 4             |
| <b>AP2/EREBP</b> | Cold, drought, NaCl  | CRT/DRE             | CCGAC     | 6               | 0                | 0               | 0             |
|                  |                      |                     | CGAC      | 10              | 6                | 7               | 3             |
| <b>AP2/RAV</b>   | Photoperiodism       | B3                  | CAACA     | 2               | 8                | 6               | 6             |
| <b>bHLH</b>      | Iron toxicity        | IRO2                | CACGTG    | 3               | 3                | 0               | 2             |
| <b>bZIP</b>      | ABA, NaCl, drought,  | G-box1              | CACGTG    | 3               | 3                | 0               | 2             |
| <b>bZIP</b>      | Salt, Pathogen       | GT-1-like box       | GAAAAA    | 2               | 3                | 4               | 8             |
| <b>ERF</b>       | Defense responses    | GCC box             | AGCCG     | 1               | 2                | 3               | 0             |
| <b>GATA</b>      | Light response       | GATA box            | GATA      | 10              | 17               | 15              | 14            |
| <b>MADS</b>      | Plant development    | MIKC                | CC[A/T]5  | 1               | 1                | 2               | 1             |
| <b>MYB like</b>  | Light response       | I BOX               | AAACCA    | 3               | 2                | 2               | 4             |
| <b>MYB/SANT</b>  | Gibberellin response | GARC                | AACAAA    | 2               | 2                | 6               | 0             |
| <b>MYC-like</b>  | Cold stress          | ICE1-like           | CATTTG    | 4               | 3                | 1               | 0             |
| <b>bHLH</b>      |                      |                     |           |                 |                  |                 |               |
| <b>NAC</b>       | Cold, drought,NaCl,  | NAC                 | CATGT     | 3               | 5                | 3               | 8             |
| <b>TCP/PCF1</b>  | Oxidative stress     | Site 2              | TGGGC     | 6               | 5                | 2               | 2             |
| <b>WRKY</b>      | Bacterial blight     | PRE2                | ACGCTG    | 2               | 1                | 0               | 1             |
|                  |                      | PRE4                | TGCGCT    | 1               | 0                | 2               | 0             |

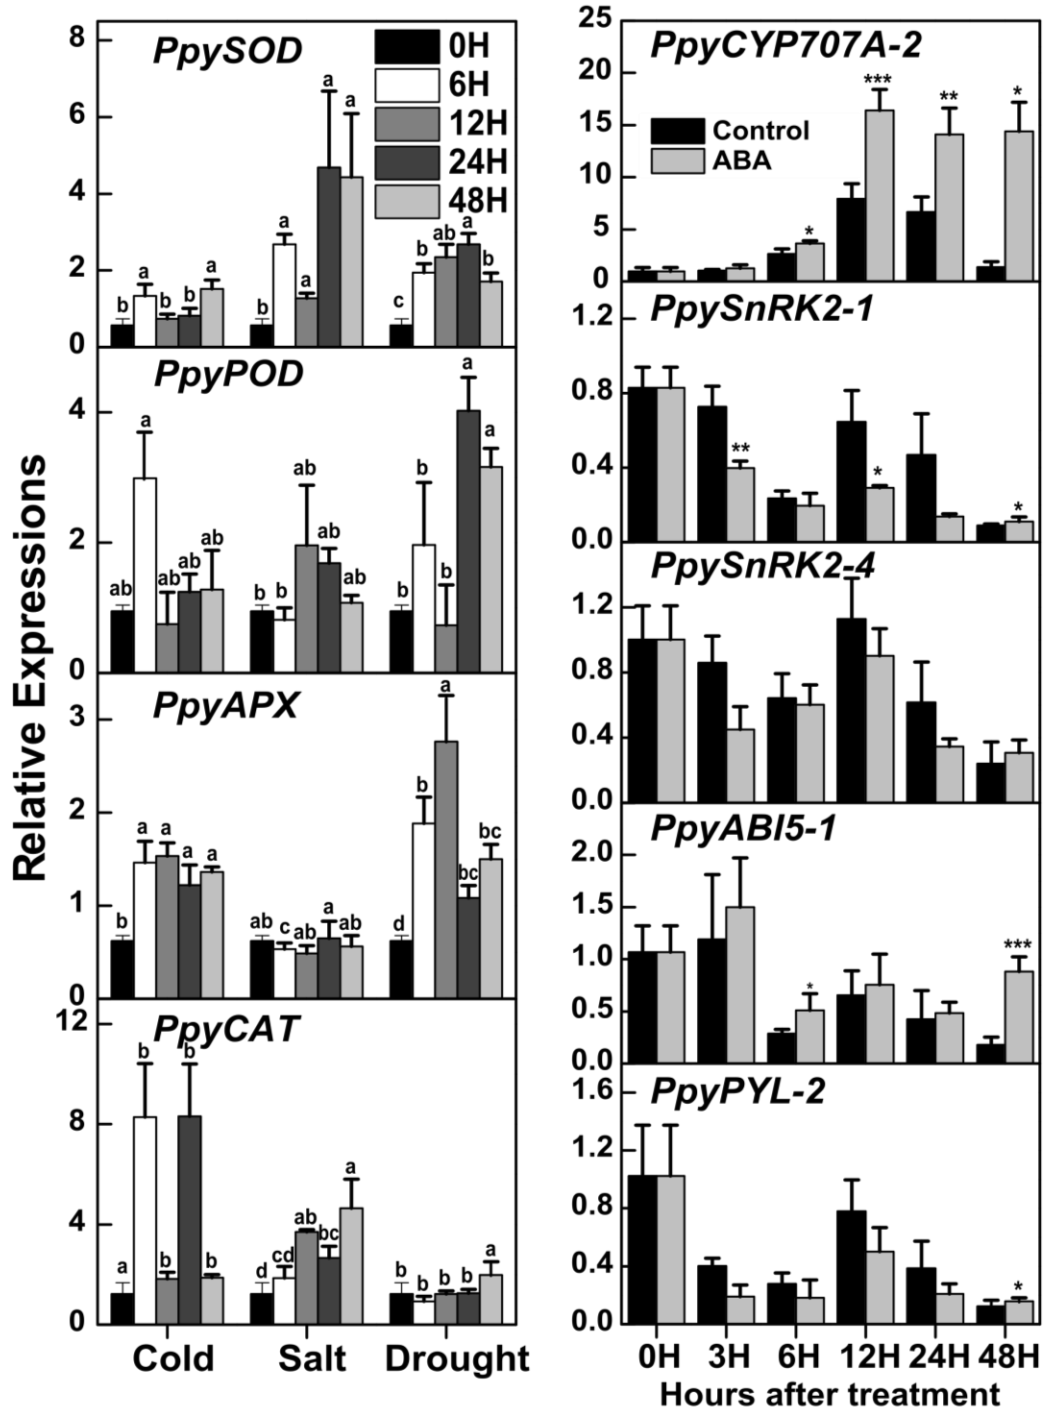

**Figure S2. Expression analysis of antioxidant and ABA-responsive genes in pear explants and pear calli during abiotic stresses and ABA treatment.** Both relative expressions were normalized to *PpyActin* expression level. Error bars indicate standard errors from three biological replicates (\* $P < 0.05$ , \*\* $P < 0.01$ , \*\*\* $P < 0.001$ ) while means with different letters had significant differences ( $P < 0.05$ ).

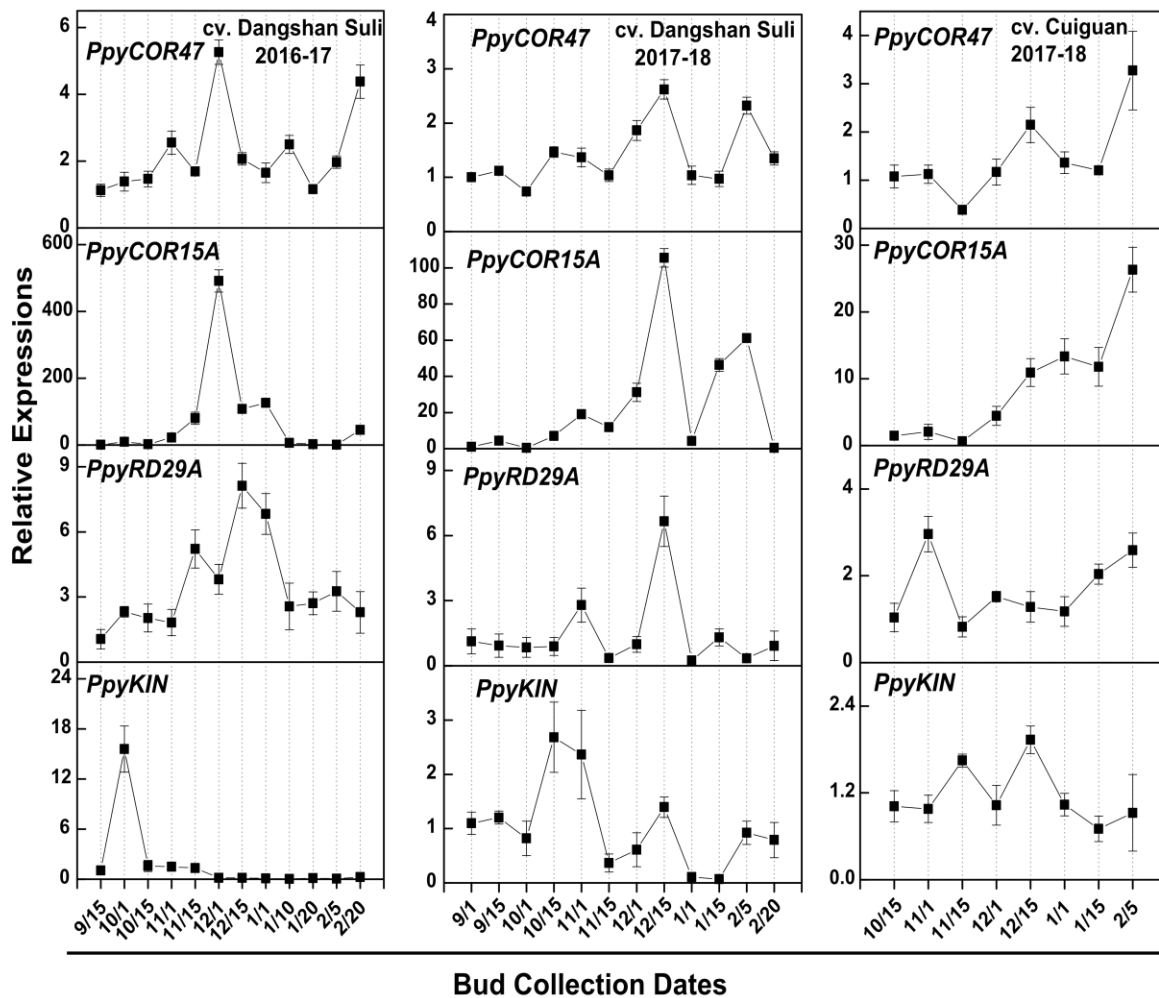

**Figure S3. Relative expressions of *PpyCORs* during bud endodormancy in *Pyrus pyrifolia* cv 'Dangshan Suli' and 'Cuiguan' during two successive years 2016-2017 and 2017-2018.** Buds were collected from 9/15 to 2/25 with about 15 days interval. The data were normalized to *PpyActin* expression level and the mean expression value was premeditated from 4 independent replicates. The standard deviation was shown by vertical bars.

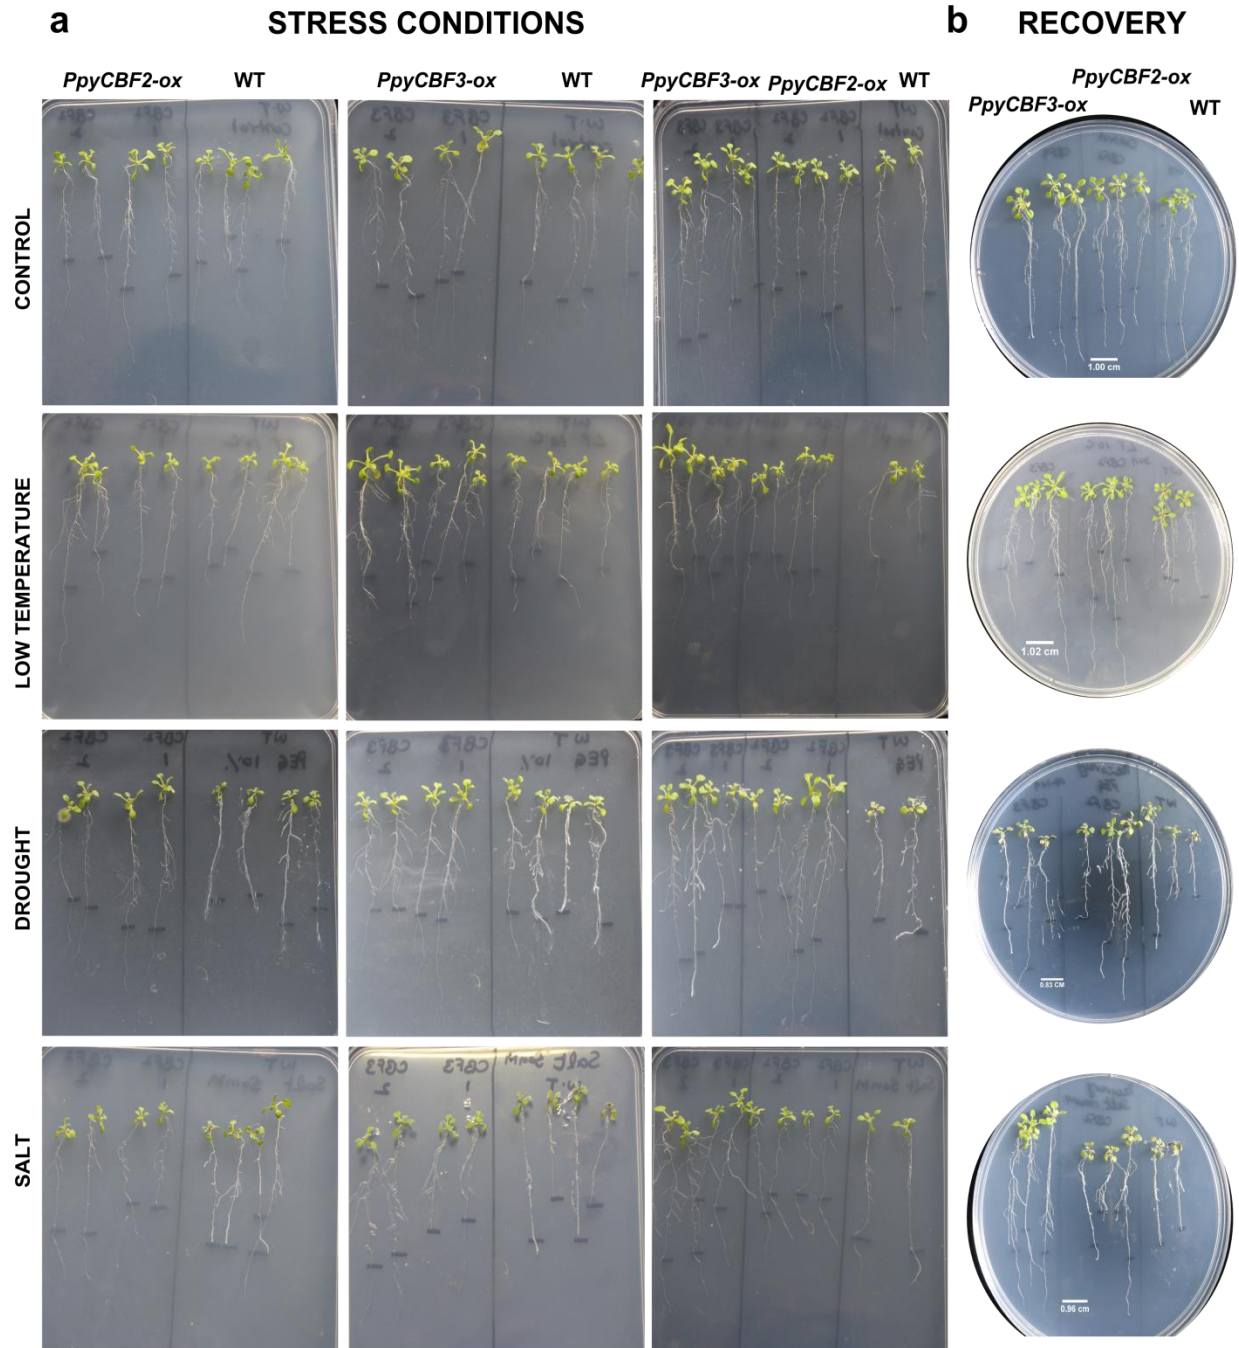

**Figure S4. Phenotypic analysis of *PpyCBF2* and *PpyCBF3* overexpressing arabidopsis and WT during abiotic stresses and recovery periods.** **a** Phenotype of overexpressed and WT arabidopsis during control, LT, drought and salt stresses. Black lines indicate the root lengths before stresses while below these lines are increase in root lengths during abiotic stress conditions. **b**. After abiotic stress, explants were transformed into normal conditions without abiotic stress conditions to check their recovery.

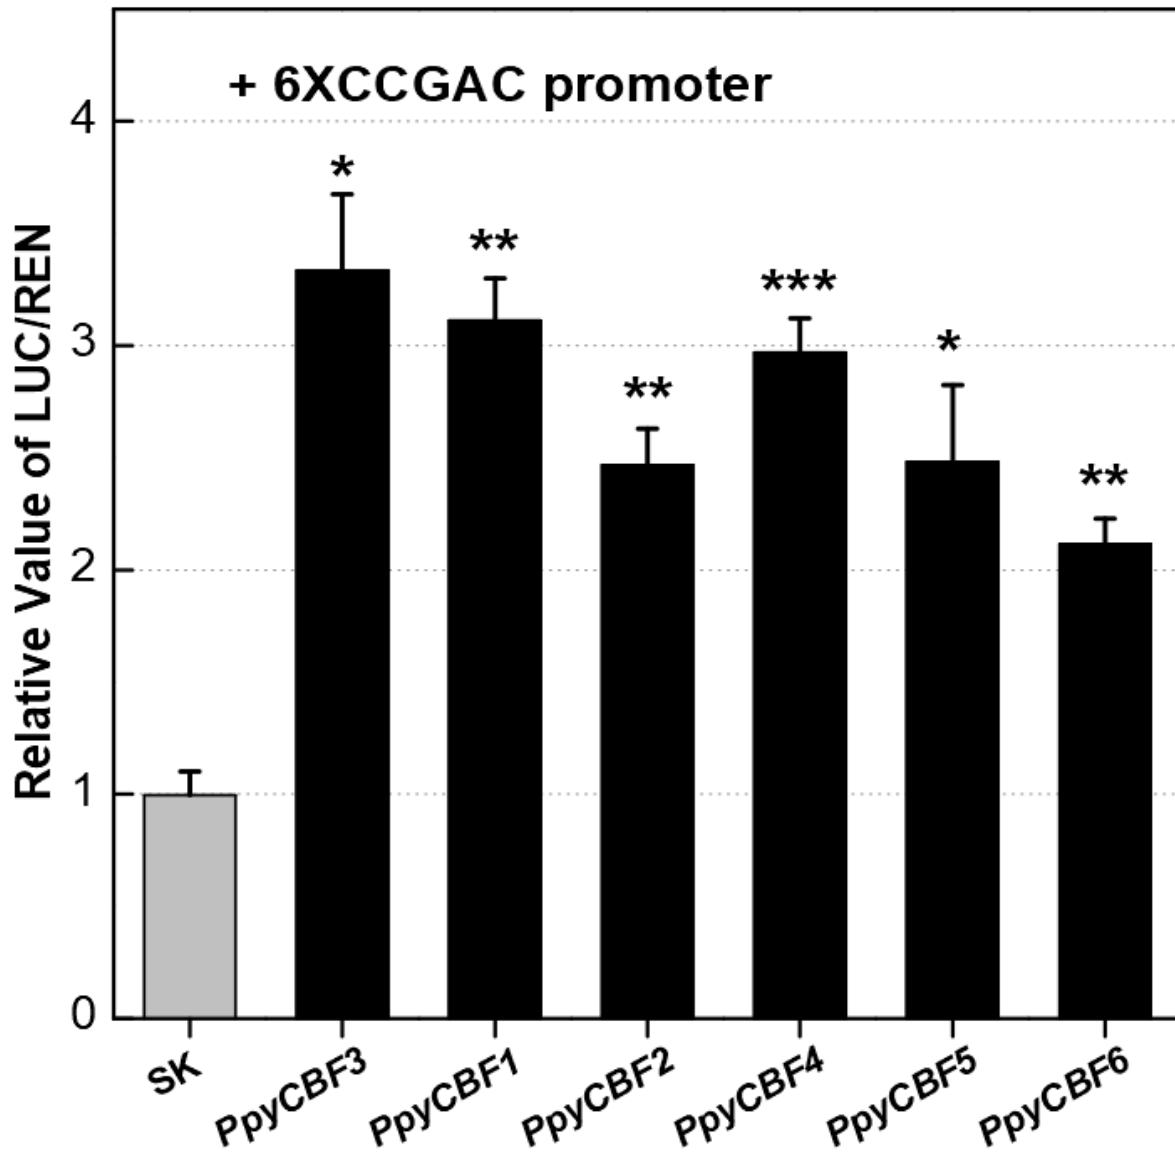

**Figure S5. Transcriptional activity of *PpyCBFs* with 6XCRT binding sites.** The ratio of LUC/REN of the empty vector (SK) plus promoter was used as calibrator (set as 1). Three independent experiments were done to verify the results. Error bars showed SEs with at least four biological replicates while asterisks showed significant differences of genes SK with empty SK (\* $P < 0.05$ , \*\* $P < 0.01$ , \*\*\* $P < 0.001$ ).
